# Supplementary material
Source: PubMed Central journal article supplement (PMC6588449)
Supplement: NIHMS1005643-supplement-Supplemental_material.pdf [file NIHMS1005643-supplement-Supplemental_material.pdf]

## Supplemental Materials

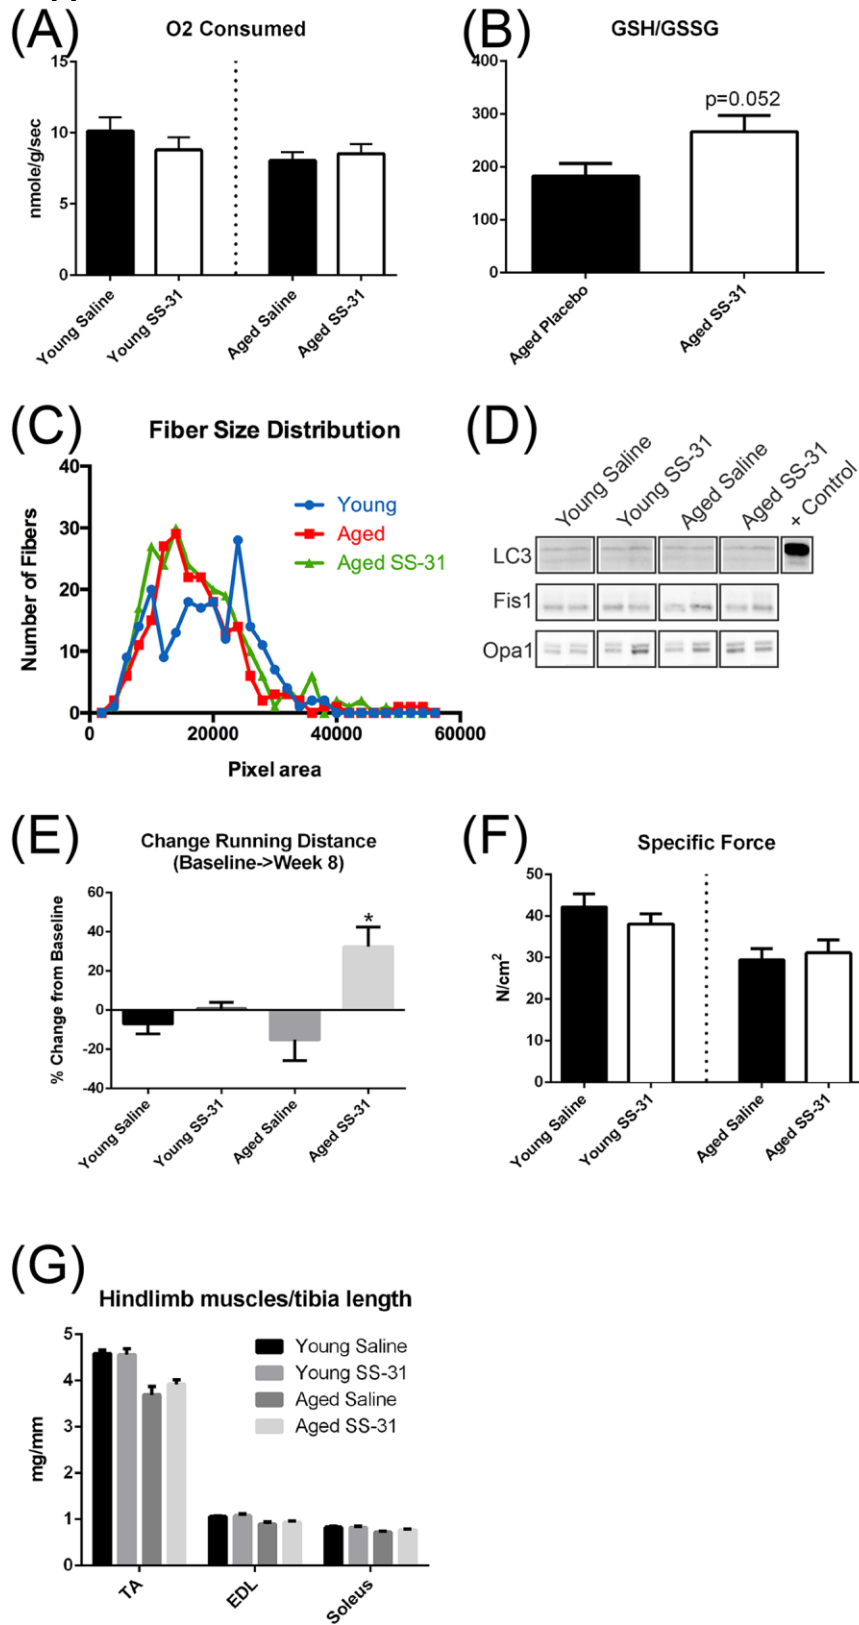

**Supplemental Figure 1. (A)** Hindlimb oxygen consumption measured using optical spectroscopy. **(B)** Ratio of reduced to oxidized glutathione in gastrocnemius. **(C)** Tibialis anterior fiber size distribution. **(D)** Representative western blot lanes showing no change in autophagy (LC3), mitochondrial fission (Fis1), or fusion (Opa1) **(E)** Treadmill performance change from baseline **(F)** Specific force as a function of cross-sectional area (CSA). **(G)** hindlimb muscle mass normalized to tibia length.

| Isoform (s)                                                         | Young       | Aged Saline |                     | Aged SS-31  |                    |
|---------------------------------------------------------------------|-------------|-------------|---------------------|-------------|--------------------|
|                                                                     | % of total  | % of total  | p-value (vs. Young) | % of total  | p-value (vs. Aged) |
| 18:2-18:2-16:1-16:1                                                 | 1.0 ± 0     | 1.0 ± 0.0   | n/a                 | 0.8 ± 0.20  | 0.3466             |
| 18:1-18:2-16:1-16:1                                                 | 1.0 ± 0.32  | 1.0 ± 0.0   | >0.9999             | 0.8 ± 0.20  | 0.3466             |
| 18:1-18:1-16:1-16:1                                                 | 0.60 ± 0.25 | 0.20 ± 0.20 | 0.2415              | 0.2 ± 0.20  | >0.9999            |
| 18:1-18:1-16:0-16:1                                                 | 0.40 ± 0.25 | 0.20 ± 0.20 | 0.5447              | 0.2 ± 0.20  | >0.9999            |
| 18:1-18:1-16:0 16:0;<br>18:2-18:0-16:0-16:0;<br>18:1-18:0-16:0-16:1 | 0.40 ± 0.25 | 0.20 ± 0.20 | 0.5447              | 0.2 ± 0.20  | >0.9999            |
| 20:4-18:2-16:1-16:1                                                 | 0.0 ± 0.0   | 0.0 ± 0.0   | n/a                 | 0.0 ± 0.0   | n/a                |
| 18:2-18:2-18:2-16:1                                                 | 4.2 ± 0.20  | 4.2 ± 0.20  | >0.9999             | 3.6 ± 0.51  | 0.3052             |
| 18:2-18:2-18:2-16:0                                                 | 4.8 ± 0.73  | 3.4 ± 0.24  | 0.1083              | 3.6 ± 0.40  | 0.6811             |
| 18:2-18:1-18:1-16:1<br>18:2-18:2-18:1-16:0                          | 3.2 ± 0.49  | 2.4 ± 0.24  | 0.1823              | 2.2 ± 0.37  | 0.6666             |
| 16:1-18:1-18:1-18:1                                                 | 1.4 ± 0.40  | 1.2 ± 0.20  | 0.6666              | 1.2 ± 0.37  | >0.9999            |
| 18:3-18:3-18:2-18:2;<br>16:1-20:4-20:4-16:1                         | 0.40 ± 0.24 | 0.40 ± 0.24 | >0.9999             | 0.2 ± 0.20  | 0.5447             |
| 18:3-18:2-18:2-18:2;<br>16:1-20:4-20:4-16:0                         | 1.0 ± 0.0   | 1.0 ± 0.0   | n/a                 | 1.0 ± 0.0   | n/a                |
| 18:2-18:2-18:2-18:2                                                 | 18.8 ± 3.4  | 24.0 ± 1.3  | 0.1893              | 20.8 ± 1.9  | 0.2035             |
| 18:2-18:2-18:2-18:1                                                 | 15.4 ± 0.93 | 16.2 ± 0.66 | 0.5028              | 16.0 ± 0.32 | 0.7924             |
| 18:2-18:2-18:1-18:1                                                 | 7.6 ± 0.93  | 6.8 ± 0.58  | 0.4860              | 7.8 ± 0.37  | 0.1869             |
| 18:2-18:2-18:1-18:0;<br>18:2-18:1-18:1-18:1                         | 0.80 ± 0.37 | 1.0 ± 0.32  | 0.6983              | 1.0 ± 0.32  | >0.9999            |
| 18:2-18:2-18:2-20:5                                                 | 2.4 ± 0.24  | 2.2 ± 0.20  | 0.5447              | 2.0 ± 0.32  | 0.6075             |
| 18:2-18:2-18:2-20:4                                                 | 3.4 ± 0.51  | 2.8 ± 0.20  | 0.3052              | 3.2 ± 0.20  | 0.1950             |
| 18:2-18:2-18:2-20:3                                                 | 3.6 ± 0.25  | 3.2 ± 0.20  | 0.2415              | 4.0 ± 0.0   | 0.0039             |
| 18:2-18:2-18:2-20:2                                                 | 3.2 ± 0.20  | 3.0 ± 0.32  | 0.6075              | 3.0 ± 0.0   | >0.9999            |
| 18:1-18:2-18:2-20:2                                                 | 2.0 ± 0.32  | 1.8 ± 0.20  | 0.6075              | 1.8 ± 0.20  | >0.9999            |
| 18:1-18:2-18:2-20:1;<br>18:1-18:1-18:2-20:2                         | 0.0 ± 0.0   | 0.0 ± 0.0   | n/a                 | 0.0 ± 0.0   | n/a                |
| 18:2-18:2-18:2-22:6                                                 | 9.6 ± 0.68  | 9.8 ± 0.37  | 0.8028              | 10.4 ±      | 0.3706             |

|                                             |                |                |        |                |         |
|---------------------------------------------|----------------|----------------|--------|----------------|---------|
|                                             |                |                |        | 0.51           |         |
| 18:2-18:2-18:2-22:5;<br>18:1-18:2-18:2-22:6 | 8.4 ± 0.68     | 7.0 ± 0.0      | 0.0729 | 8.4 ± 0.40     | 0.0081  |
| 18:2-18:2-18:2-22:4;<br>18:1-18:1-18:2-22:6 | 1.4 ± 0.40     | 1.0 ± 0.0      | 0.3466 | 1.2 ± 0.20     | 0.3466  |
| 18:2-18:2-20:4-22:6                         | 0.0 ± 0.0      | 0.20 ±<br>0.20 | 0.3466 | 0.20 ±<br>0.20 | >0.9999 |
| 18:2-18:2-20:3-22:6                         | 0.40 ±<br>0.24 | 0.60 ±<br>0.24 | 0.5796 | 0.80 ±<br>0.20 | 0.5447  |
| 18:2-18:2-20:2-22:6;<br>18:1-18:2-20:3-22:6 | 0.60 ±<br>0.24 | 1.0 ± 0.0      | 0.1411 | 1.0 ± 0.0      | n/a     |
| 18:2-18:2-22:6-22:6                         | 1.4 ± 0.24     | 1.2 ± 0.20     | 0.5447 | 1.4 ± 0.24     | 0.5447  |
| 18:2-18:1-22:6-22:6                         | 0.20 ±<br>0.20 | 0.40 ±<br>0.24 | 0.5447 | 0.80 ±<br>0.20 | 0.2415  |

**Supplemental Table 1 Cardiolipin isoform distribution.** Data are normalized as percentage of total cardiolipin and represented as means ± SE

| Top Canonical Pathways                 | p-value                                       | Overlap        |
|----------------------------------------|-----------------------------------------------|----------------|
| LXR/RXR Activation                     | 6.30x10 <sup>-5</sup>                         | 20.0% 6/30     |
| FXR/RXR Activation                     | 1.11x10 <sup>-4</sup>                         | 18.2% 6/33     |
| Complement System                      | 4.71x10 <sup>-4</sup>                         | 42.9% 3/7      |
| Acute Phase Response Signaling         | 5.78x10 <sup>-4</sup>                         | 13.6% 6/44     |
| Systemic Lupus Erythematosus Signaling | 6.44x10 <sup>-3</sup>                         | 18.8% 3/16     |
| Top Diseases and Bio Functions         | p-value                                       | # of Molecules |
| Connective Tissue Disorders            | 2.41x10 <sup>-2</sup> - 1.73x10 <sup>-6</sup> | 17             |
| Organismal Injury and Abnormalities    | 2.49x10 <sup>-2</sup> - 1.73x10 <sup>-6</sup> | 40             |
| Ophthalmic Disease                     | 2.49x10 <sup>-2</sup> - 1.4x10 <sup>-5</sup>  | 9              |
| Renal and Urological Disease           | 1.60x10 <sup>-2</sup> - 1.73x10 <sup>-5</sup> | 17             |
| Inflammatory Response                  | 2.49x10 <sup>-2</sup> - 1.88x10 <sup>-5</sup> | 23             |
| Molecular and Cellular Functions       | p-value                                       | # of Molecules |
| Cell-To-Cell Signaling and Interaction | 2.41x10 <sup>-2</sup> - 1.06x10 <sup>-4</sup> | 16             |
| Cellular Movement                      | 2.41x10 <sup>-2</sup> - 1.06x10 <sup>-4</sup> | 17             |
| Protein Trafficking                    | 2.93x10 <sup>-4</sup> - 1.63x10 <sup>-4</sup> | 8              |
| Post-Translational Modification        | 2.33x10 <sup>-3</sup> - 2.93x10 <sup>-4</sup> | 12             |
| Protein Synthesis                      | 1.76x10 <sup>-2</sup> - 2.93x10 <sup>-4</sup> | 19             |

**Supplemental Table 2 Ingenuity Pathway Analysis.** Relative protein intensity changes Aged vs Young. FDR<0.1
